# Supplementary material for: A comparative analysis of the rhizosphere microbial communities among three species of the Salix genus
Source: PeerJ journal article supplement (doi:10.7717/peerj.19182), 2025-03-28
Supplement: Figure_S1.pdf [file Figure_S1.pdf]

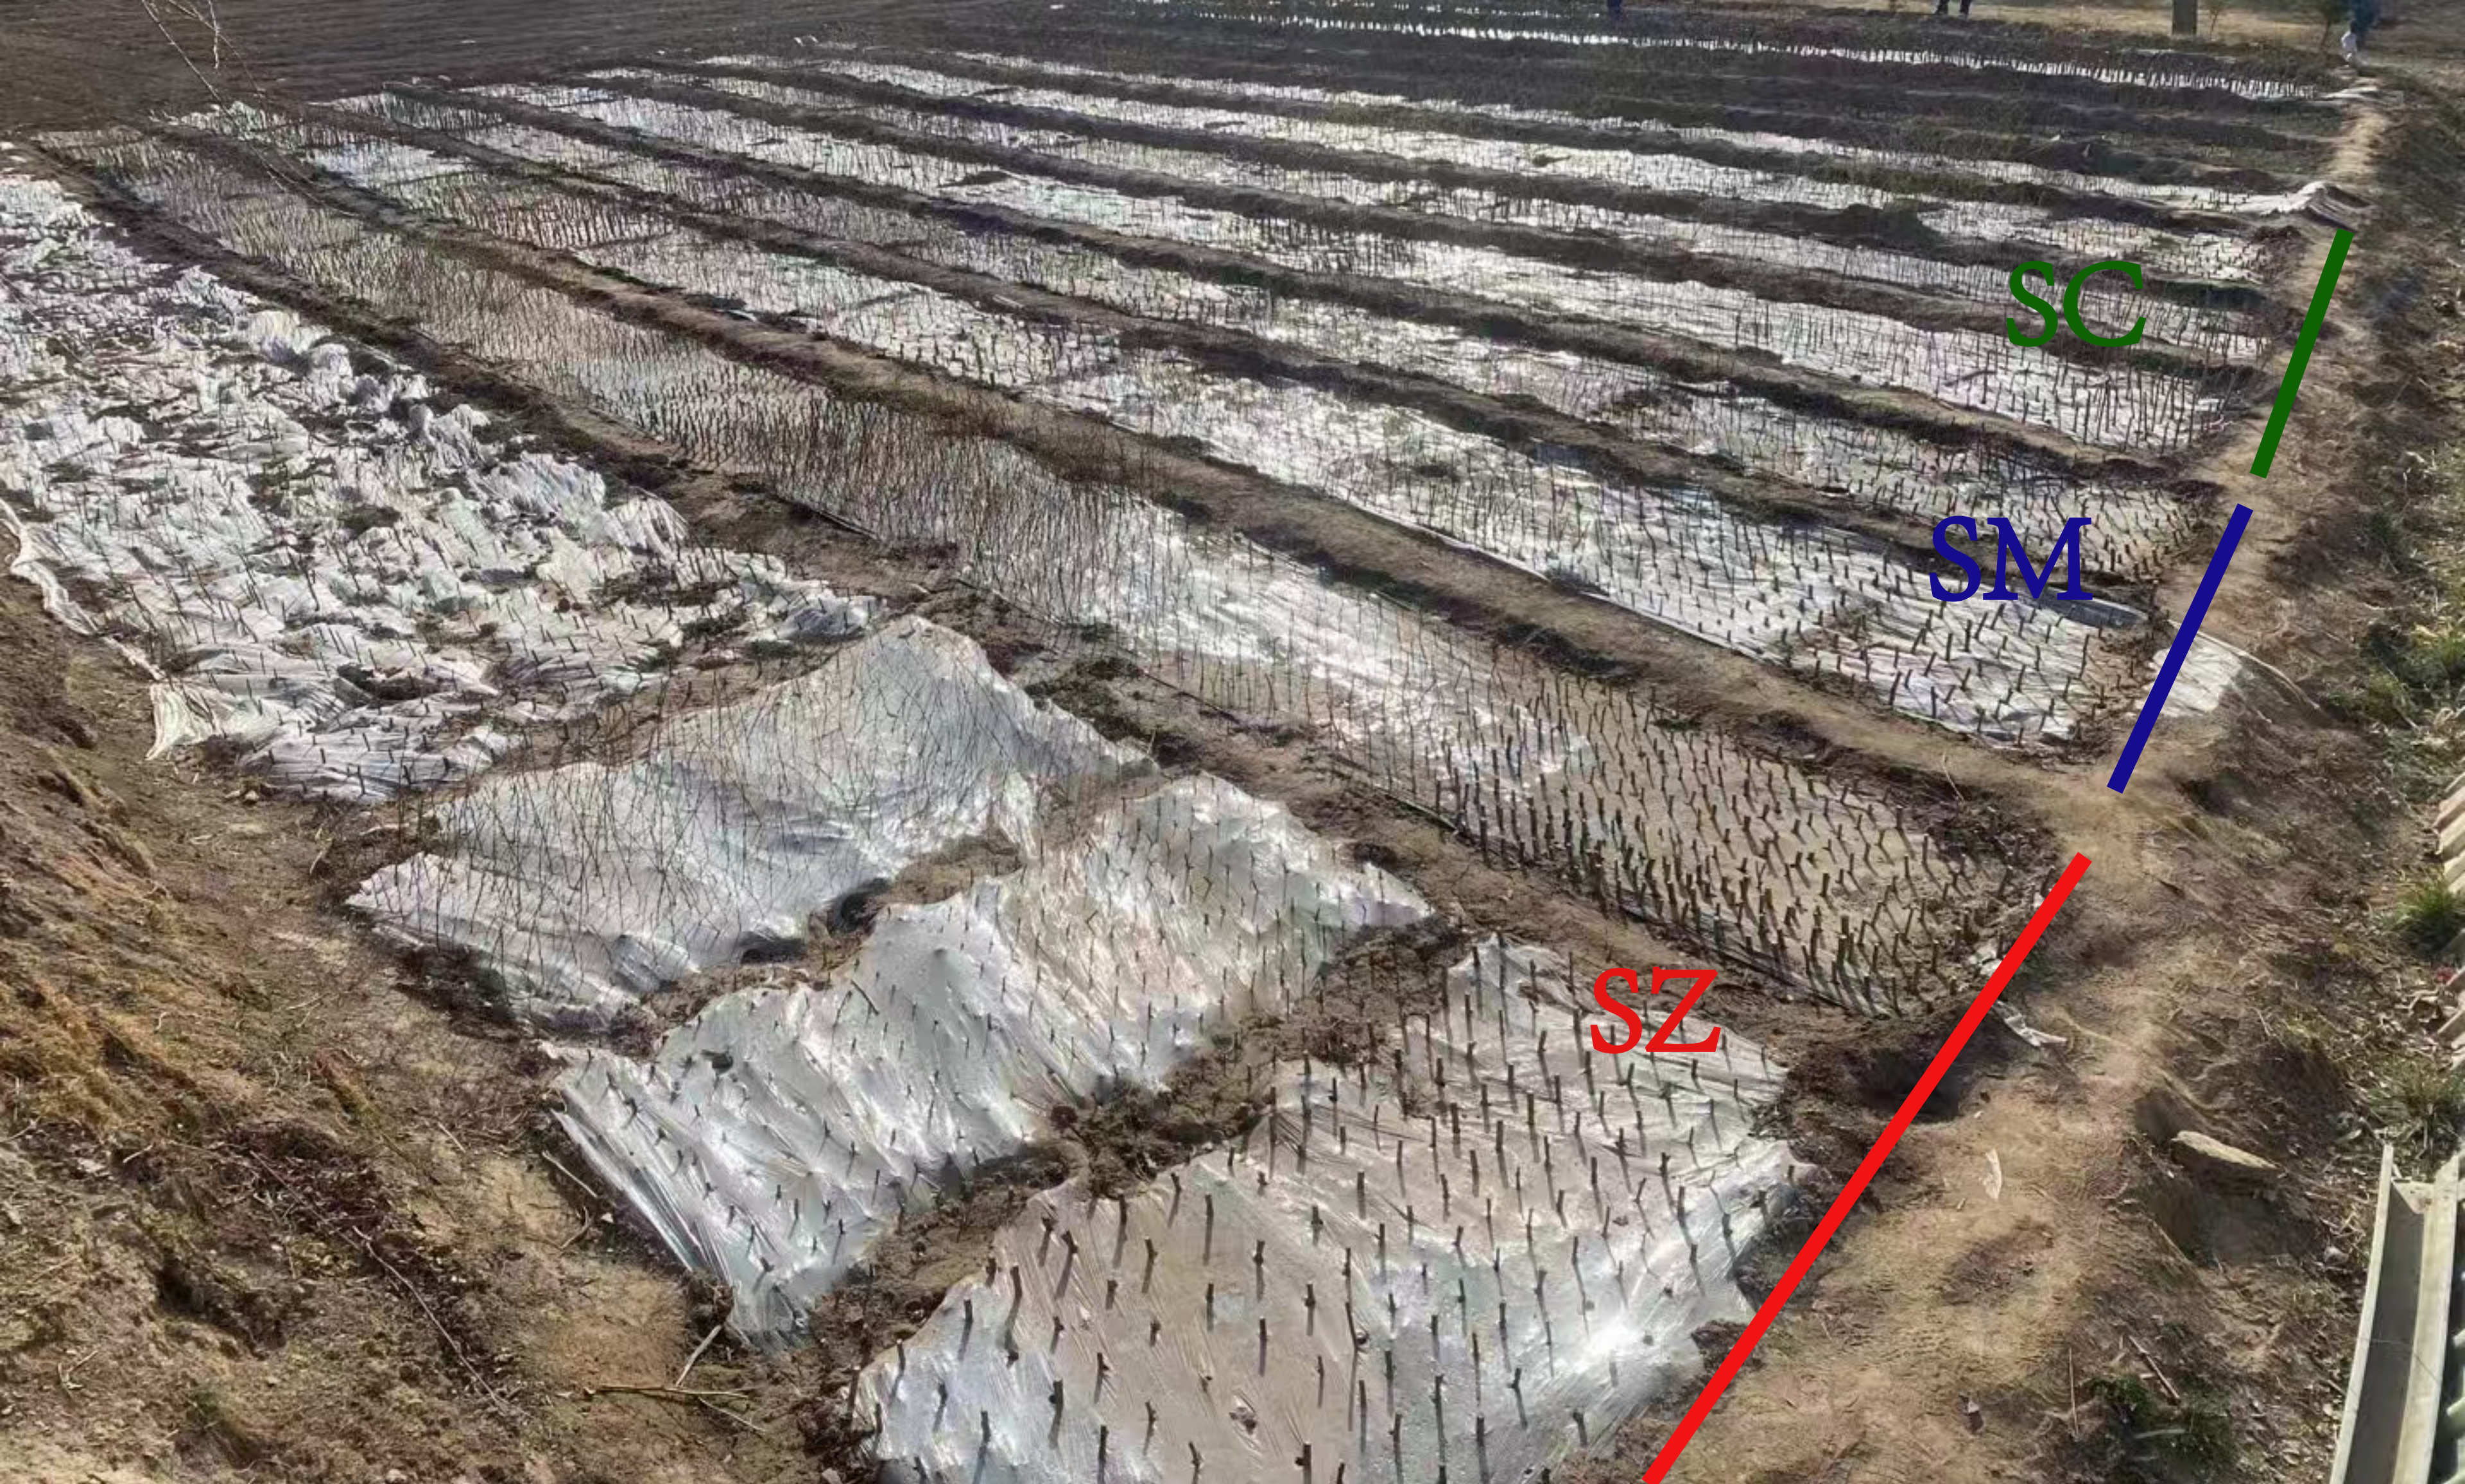

SC

SM

SZ
